# Supplementary material for: Trophic Selective Pressures Organize the Composition of Endolithic Microbial Communities From Global Deserts
Source: PubMed Central journal article supplement (PMC6960110; doi:10.3389/fmicb.2019.02952), 2020-01-08
Supplement: Data_Sheet_1.pdf [file Data_Sheet_1.pdf]

# **Trophic Selective Pressures Organize the Composition of Endolithic Microbial Communities from Global Deserts**

## **Supplementary Materials**

Evan B. Qu<sup>1</sup>, Chris C. Omelon<sup>2</sup>, Aharon Oren<sup>3</sup>, Victoria Meslier<sup>1</sup>, Don A. Cowan<sup>4</sup>, Gillian Maggs-Kölling<sup>5</sup>, and Jocelyne DiRuggiero<sup>1§</sup>

<sup>1</sup>*Johns Hopkins University, Department of Biology, Baltimore, USA*

<sup>2</sup>*Queen's University, Department of Geography and Planning, Kingston, Ontario, Canada* <sup>3</sup>*The Hebrew University of Jerusalem, Institute of Life Sciences, Edmond J. Safra Campus, Jerusalem, Israel*

<sup>4</sup>*Centre for Microbial Ecology and Genomics, Department of Biochemistry, Genetics and Microbiology, University of Pretoria, Pretoria, South Africa*

<sup>5</sup>*Gobabeb-Namib Research Institute, Walvis Bay, Namibia*

### **Table of Contents**

**Table S1:** Sampling sites and dates, number of rocks sequenced per site

**Table S2:** Weather data from sites.

**Table S3:** Chemical composition of sandstone samples

**Table S4:** Water-soluble ions from sandstone samples

**Table S5:** Sandstone physical properties

**Table S6:** Alpha diversity by site

**Table S7:** Per-site relative abundances of potential anoxygenic phototrophic clades, based on partial 16S rRNA sequences

**Figure S1:** Diversity rarefaction curves

**Figure S2:** Grain size distributions for sandstones

**Figure S3:** Venn diagrams showing distribution of bacterial OTUs

**Figure S4:** Heatmap of Namib Desert Actinobacteria

### **Scripts used for analyses of sequence data**

| <b>Desert</b>                   | <b>Site Name</b>  | <b>GPS coordinates</b>     | <b>Collection Date</b> | <b>No. 16S rRNA samples</b> | <b>No. ITS samples</b> |
|---------------------------------|-------------------|----------------------------|------------------------|-----------------------------|------------------------|
| Negev Desert, Israel            | Ramon Crater      | 30°37'20"N,<br>34°50'38"E  | Sep-2016               | 10                          | -                      |
|                                 | Timna Park        | 29°47'25"N,<br>34°58'2"E   | Sep-2016               | 10                          | -                      |
| Namib Desert, Namibia           | Namib Coastal     | 23°32'12"S,<br>14°59'36"E  | Apr-2017               | 10                          | -                      |
|                                 | Namib Central     | 23°40'32"S,<br>15°16'24"E  | Apr-2017               | 10                          | -                      |
|                                 | Namib Far East    | 23°45'22"S,<br>15°46'14"E  | Apr-2017               | 10                          | -                      |
| Colorado Plateau, USA           | Escalante         | 37°45'5"N,<br>111°26'32"W  | Jul-2018               | 10                          | 6                      |
| Canadian Arctic                 | Cape Bounty       | 74°54'26"N<br>109°35'46"W  | May-2018               | 9                           | 10                     |
|                                 | Eureka            | 79°59'21"N,<br>85°56'02"W  | May-2018               | 10                          | 2                      |
| McMurdo Dry Valleys, Antarctica | University Valley | 77°51'52"S,<br>160°43'31"E | Jan-2013               | 10                          | 7                      |

**Table S1: Sampling sites and dates, number of rocks sequenced per site.**

| Desert                                        | Negev Desert, Israel <sup>1,2</sup> |                   | Namib Desert, Namibia <sup>3</sup> |         |          | Colorado Plateau, USA <sup>6,7</sup> | Canadian Arctic <sup>4,5</sup> |             | McMurdo Dry Valleys, Antarctica <sup>8,9</sup> |       |
|-----------------------------------------------|-------------------------------------|-------------------|------------------------------------|---------|----------|--------------------------------------|--------------------------------|-------------|------------------------------------------------|-------|
| Sampling site                                 | Ramon Crater                        | Timna Park        | Coastal                            | Central | Far East | Escalante                            | Eureka                         | Cape Bounty | University Valley                              |       |
| Elevation (m.a.s.l.)                          | 865                                 | 255               | 386                                | 586     | 1030     | 1726                                 | 10                             | 88          | 1700                                           |       |
| Air Temperature (°C)                          | Ave                                 | 18.6              | 26.8                               | 21.4    | 21.9     | 22.7                                 | 12.3                           | -17.6       | -14.3                                          | -23.4 |
|                                               | Min                                 | 0.7               | 6.3                                | -0.6    | 8.7      | 8.6                                  | -6.8                           | -50.5       | -49.4                                          | -45.0 |
|                                               | Max                                 | 39.7              | 45.7                               | 43.3    | 32.9     | 32.7                                 | 34.7                           | 18.5        | 17.4                                           | 5.0   |
| RH (%)                                        | Ave                                 | 53                | 36                                 | 48      | 41       | 30                                   | 82                             | 77          | 91                                             | 46    |
|                                               | Min                                 | 3                 | 5                                  | 25      | 9        | 5                                    | 25                             | 27          | 32                                             | 10    |
|                                               | Max                                 | 100               | 90                                 | 64      | 87       | 79                                   | 100                            | 100         | 100                                            | 99    |
| Precipitation (mm/yr)                         | 37 <sup>(a)</sup>                   | 16 <sup>(a)</sup> | 14                                 | 36      | 62       | 232                                  | 48                             | 57          | 0 <sup>(b)</sup>                               |       |
| Daily solar radiation (W/m <sup>2</sup> /day) | 223                                 |                   | 275                                |         |          | 225                                  | 92                             |             | 103                                            |       |

<sup>1</sup>Israel Meteorological Service - Mitzpe Ramon and Eilat stations; <<http://www.ims.gov.il>> | 2015-7 to 2017-7

<sup>2</sup>Evseev and Kudish, Analysis of solar irradiation measurements at Beer Sheva, Israel from 1985 through 2013, *Energy Conservation and Management*. 97: 307-314 (2015) | 2012-1 to 2013-8

<sup>3</sup>Sasscal WeatherNet - Gobabeb Met, Garnet Koppie, Ganab stations; <<http://www.sasscalweather.net>> | 2015-7 to 2017-7

<sup>4</sup>Environment and Natural Resources, Government of Canada | 2016-1 to 2017-12

<sup>5</sup>Cape Bounty Arctic Watershed Observatory; <<https://capebountyresearch.com/>> | 2016-1 to 2017-12

<sup>6</sup>NOAA National Centers for Environmental Information - Escalante and Bryce Canyon stations; <<https://www.ncdc.noaa.gov>> | 2017-1 to 2018-12

<sup>7</sup>NOAA National Solar Radiation Database - Bryce Canyon Airport station; <<https://www.ncdc.noaa.gov>> | 2010-1 to 2010-12

<sup>8</sup>Lacelle et al, Solar Radiation and Air and Ground Temperature Relations in the Cold and Hyper-Arid Quartermain Mountains, McMurdo Dry Valleys of Antarctica, *Permafrost and Periglac. Process.* 27: 163-176 (2016) | 2010-1 to 2012-1

<sup>9</sup>McMurdo Dry Valleys LTER - Beacon valley station; <<https://www.mcmllter.org/>> | 2010-1 to 2012-12

<sup>(a)</sup>Rainfall data were taken from 2017-2018 due to abnormal rainfall events after sample collection in 2016

<sup>(b)</sup>University Valley receives no liquid rainfall, all moisture is from humidity and meltwater

**Table S2: Weather data from sites.** Average, minimum and maximum weather data for a two-year period encompassing the sampling date of each site. Data sources and special notes are listed below the table.

| %                                  | Namib Desert |         |          | Negev Desert |            | Colorado Plateau | Canadian Arctic |        | McMurdo Dry Valleys |
|------------------------------------|--------------|---------|----------|--------------|------------|------------------|-----------------|--------|---------------------|
|                                    | Coastal      | Central | Far East | Ramon Crater | Timna Park | Escalante        | Cape Bounty     | Eureka | University Valley   |
| <b>SiO<sub>2</sub></b>             | 83.9         | 60.7    | 81.1     | 91.0         | 88.6       | 92.7             | 92.7            | 98.5   | 96.3                |
| <b>Al<sub>2</sub>O<sub>3</sub></b> | 4.45         | 3.60    | 3.79     | 0.82         | 3.07       | 3.24             | 2.86            | 0.30   | 0.39                |
| <b>Fe<sub>2</sub>O<sub>3</sub></b> | 3.60         | 3.79    | 4.80     | 8.40         | 7.01       | 0.82             | 2.09            | 1.08   | 3.78                |
| <b>MgO</b>                         | 1.55         | 0.75    | 1.14     | 0.03         | 0.05       | 0.16             | 0.14            | 0.05   | ND                  |
| <b>CaO</b>                         | 0.47         | 15.8    | 1.28     | 0.53         | 0.08       | 0.07             | 0.08            | 0.17   | 0.02                |
| <b>K<sub>2</sub>O</b>              | 1.59         | 1.14    | 1.67     | 0.08         | 1.69       | 1.57             | 1.69            | 0.06   | 0.05                |
| <b>Na<sub>2</sub>O</b>             | 0.57         | 0.68    | 0.87     | 0.13         | 0.10       | 0.09             | 0.10            | 0.06   | 0.07                |
| <b>TiO<sub>2</sub></b>             | 0.72         | 0.30    | 0.44     | 0.19         | 0.09       | 0.09             | 0.08            | 0.08   | 0.02                |
| <b>MnO</b>                         | 0.06         | 0.06    | 0.07     | 0.08         | 0.07       | 0.01             | 0.02            | 0.01   | 0.03                |
| <b>P<sub>2</sub>O<sub>5</sub></b>  | 0.03         | 0.03    | 0.04     | 0.02         | 0.02       | 0.02             | 0.02            | 0.01   | ND                  |
| <b>Cr<sub>2</sub>O<sub>3</sub></b> | 0.01         | ND      | 0.02     | ND           | ND         | 0.06             | ND              | 0.11   | ND                  |
| <b>V<sub>2</sub>O<sub>5</sub></b>  | 0.01         | ND      | ND       | ND           | ND         | ND               | ND              | ND     | ND                  |
| <b>Loss on Ignition</b>            | 2.93         | 13.5    | 3.06     | 0            | 0          | 0.971            | 0.392           | 0.616  | 0                   |
| <b>Sum</b>                         | 99.9         | 100.4   | 98.3     | 101.3        | 100.8      | 99.8             | 100.2           | 101.0  | 100.7               |

**Table S3: Chemical composition of sandstones.** Sandstone chemical composition was measured with X-ray fluorescence mass spectrometry. Loss on Ignition represents the percent of sandstone that was made of volatile substances. ND = below detection limit.

| All units in mg/kg                   | Negev Desert |            | Namib Desert |         |          | Colorado Plateau | Canadian Arctic |        | McMurdo Dry Valleys |
|--------------------------------------|--------------|------------|--------------|---------|----------|------------------|-----------------|--------|---------------------|
|                                      | Ramon Crater | Timna Park | Coastal      | Central | Far East | Escalante        | Cape Bounty     | Eureka | University Valley   |
| <b>Anions</b>                        |              |            |              |         |          |                  |                 |        |                     |
| NO <sub>3</sub> <sup>-</sup> , as N  | 0.3          | 1.76       | 2.32         | 3.26    | 0.94     | 1.12             | 0.24            | 0.26   | 0.2                 |
| PO <sub>4</sub> <sup>3-</sup> , as P | ND           | ND         | ND           | ND      | ND       | ND               | ND              | 0.2    | ND                  |
| Cl <sup>-</sup>                      | 2            | 14         | 78           | 16      | 2        | 4                | 20              | 88     | 2                   |
| SO <sub>4</sub> <sup>2-</sup>        | 6            | 30         | 20           | 18      | 2        | ND               | 14              | 4      | 4                   |
| <b>Cations</b>                       |              |            |              |         |          |                  |                 |        |                     |
| Ca <sup>2+</sup>                     | 24           | 28         | 12           | 16      | 18       | 2                | 30              | 10     | 6                   |
| Mg <sup>2+</sup>                     | ND           | ND         | 6            | 4       | 4        | ND               | 16              | 6      | ND                  |
| Na <sup>+</sup>                      | 2            | 8          | 62           | 22      | 4        | 2                | 12              | 58     | 4                   |
| K <sup>+</sup>                       | 4            | 16         | 16           | 20      | 20       | 6                | 10              | 10     | 2                   |
| <b>Dissolved Metals</b>              |              |            |              |         |          |                  |                 |        |                     |
| Fe <sup>2+</sup> , Fe <sup>3+</sup>  | ND           | ND         | ND           | ND      | ND       | ND               | ND              | ND     | ND                  |

**Table S4: Water-soluble ions from sandstones.** Water soluble ions were extracted from crushed sandstone and measured with ion chromatography and inductively coupled plasma atomic emission spectroscopy. Units represent mg of ions per kg of rock. ND = below detection limit.

|                   | <b>D50 Grain size<br/>(<math>\mu\text{m}</math>)</b> | <b>Percent water<br/>retention</b> |
|-------------------|------------------------------------------------------|------------------------------------|
| Ramon Crater      | 268                                                  | 23.2 $\pm$ 1.7                     |
| Timna Park        | 530                                                  | 14.9 $\pm$ 0.4                     |
| Namib Coastal     | 308                                                  | 27.0 $\pm$ 1.3                     |
| Namib Central     | 233                                                  | 11.0 $\pm$ 2.9                     |
| Namib Far East    | 172                                                  | 30.3 $\pm$ 15.2                    |
| Escalante         | 150                                                  | 11.8 $\pm$ 7.0                     |
| Cape Bounty       | 239                                                  | 12.1 $\pm$ 2.1                     |
| Eureka            | 116                                                  | 18.2 $\pm$ 1.1                     |
| University Valley | 282                                                  | 10.9 $\pm$ 0.7                     |

**Table S5: Sandstone physical properties.** 50<sup>th</sup> percentile diameter (D50) of grain size distribution and percent water retention measured with a water resaturation method.

|                   | <b>Prokaryotic Diversity</b> |                 | <b>Eukaryotic Diversity</b> |                 |
|-------------------|------------------------------|-----------------|-----------------------------|-----------------|
|                   | OTUs                         | Shannon         | ESVs                        | Shannon         |
| Ramon Crater      | 41 $\pm$ 5                   | 4.57 $\pm$ 0.24 | -                           | -               |
| Timna Park        | 54 $\pm$ 7                   | 5.11 $\pm$ 0.19 | -                           | -               |
| Namib Coastal     | 50 $\pm$ 8                   | 4.57 $\pm$ 0.28 | -                           | -               |
| Namib Central     | 71 $\pm$ 4                   | 5.61 $\pm$ 0.11 | -                           | -               |
| Namib Far East    | 92 $\pm$ 4                   | 6.03 $\pm$ 0.07 | -                           | -               |
| Escalante         | 252 $\pm$ 14                 | 7.51 $\pm$ 0.10 | 60 $\pm$ 13                 | 3.28 $\pm$ 0.48 |
| Cape Bounty       | 105 $\pm$ 17                 | 6.03 $\pm$ 0.25 | 74 $\pm$ 14                 | 4.46 $\pm$ 0.37 |
| Eureka            | 125 $\pm$ 7                  | 6.57 $\pm$ 0.09 | 29 $\pm$ 10                 | 3.68 $\pm$ 0.27 |
| University Valley | 31 $\pm$ 5                   | 4.37 $\pm$ 0.20 | 20 $\pm$ 2                  | 3.26 $\pm$ 0.18 |

**Table S6: Alpha diversity by site.** Mean and standard deviation of observed OTUs/ESVs and Shannon index at each site, based on 16S rRNA gene sequences for prokaryotes and ITS sequences for eukaryotes.

|                          | <i>Alphaproteobacteria</i> |                          |                         | <i>Betaproteobacteria</i> |                       | <i>Gemmatimonadetes</i> |
|--------------------------|----------------------------|--------------------------|-------------------------|---------------------------|-----------------------|-------------------------|
|                          | <i>Acetobacteraceae</i>    | <i>Rhodospirillaceae</i> | <i>Rhodobacteraceae</i> | <i>Bradyrhizobiaceae</i>  | <i>Comamonadaceae</i> | <i>Gemmatimonas</i>     |
| <b>University Valley</b> | 0.00%                      | 0.00%                    | 0.00%                   | 0.00%                     | 0.00%                 | 0.00%                   |
| <b>Cape Bounty</b>       | 0.35%                      | 0.00%                    | 0.20%                   | 0.31%                     | 0.24%                 | 0.02%                   |
| <b>Eureka</b>            | 0.00%                      | 0.02%                    | 2.52%                   | 0.00%                     | 0.00%                 | 0.00%                   |
| <b>Escalante</b>         | 0.00%                      | 0.13%                    | 0.94%                   | 0.04%                     | 0.87%                 | 0.29%                   |
| <b>Namib Coastal</b>     | 0.00%                      | 0.00%                    | 0.14%                   | 0.00%                     | 0.17%                 | 0.14%                   |
| <b>Namib Central</b>     | 0.00%                      | 0.31%                    | 0.74%                   | 0.00%                     | 0.05%                 | 0.32%                   |
| <b>Namib Far East</b>    | 0.00%                      | 0.02%                    | 0.76%                   | 0.00%                     | 0.87%                 | 0.07%                   |
| <b>Ramon Crater</b>      | 0.00%                      | 0.00%                    | 0.66%                   | 0.00%                     | 0.00%                 | 0.00%                   |
| <b>Timna Park</b>        | 0.00%                      | 0.00%                    | 0.03%                   | 0.00%                     | 0.21%                 | 0.00%                   |

**Table S7: Per-site relative abundances of putative anoxygenic phototrophic clades based on 16S rRNA amplicon sequences.**

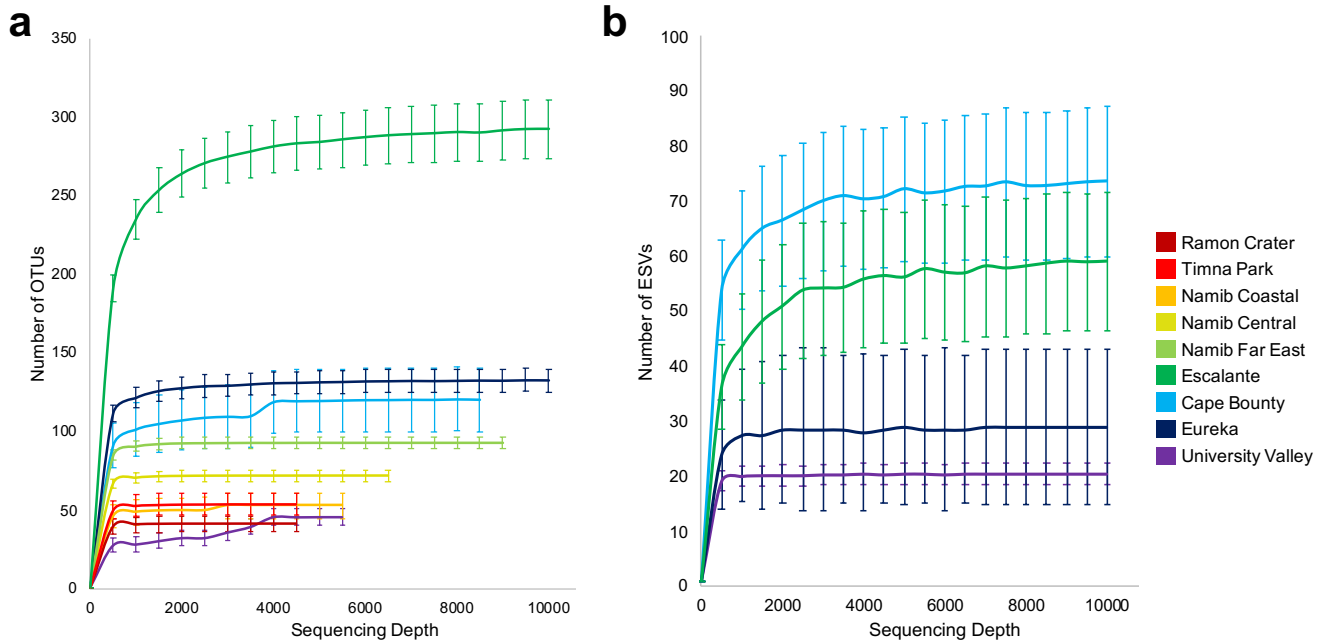

**Figure S1: Diversity rarefaction curves.** Rarefaction curves for **(a)** prokaryotic OTUs and **(b)** eukaryotic ESVs at 500-sequence sampling intervals, up to 10,000 sequences. These curves show that diversity approaches asymptote before maximum sequencing depth is reached

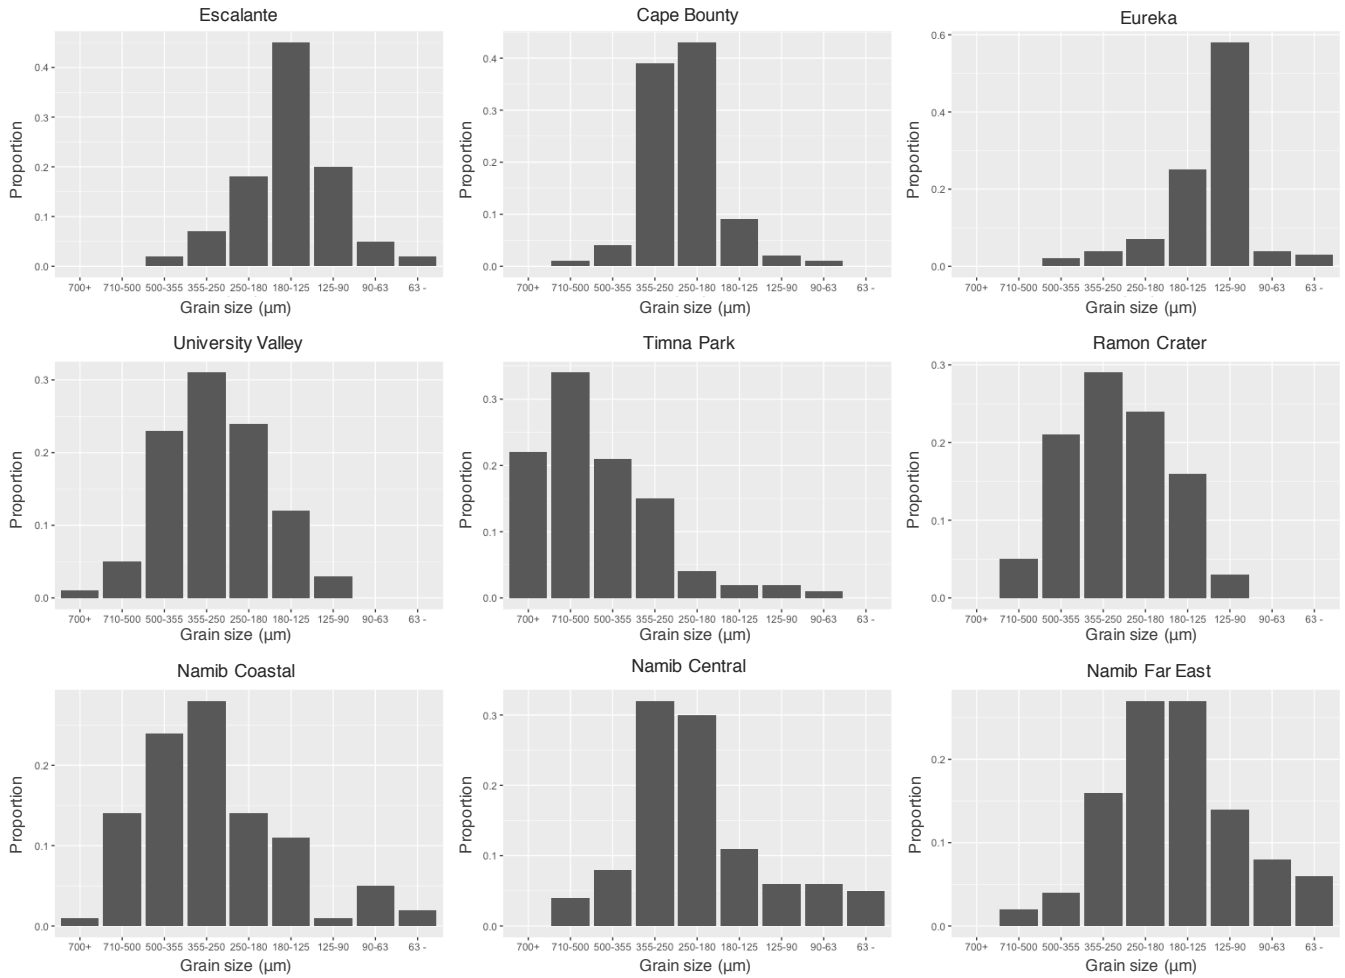

**Figure S2: Grain size distributions for sandstones.** Histograms showing grain size distributions for sandstones at each site.



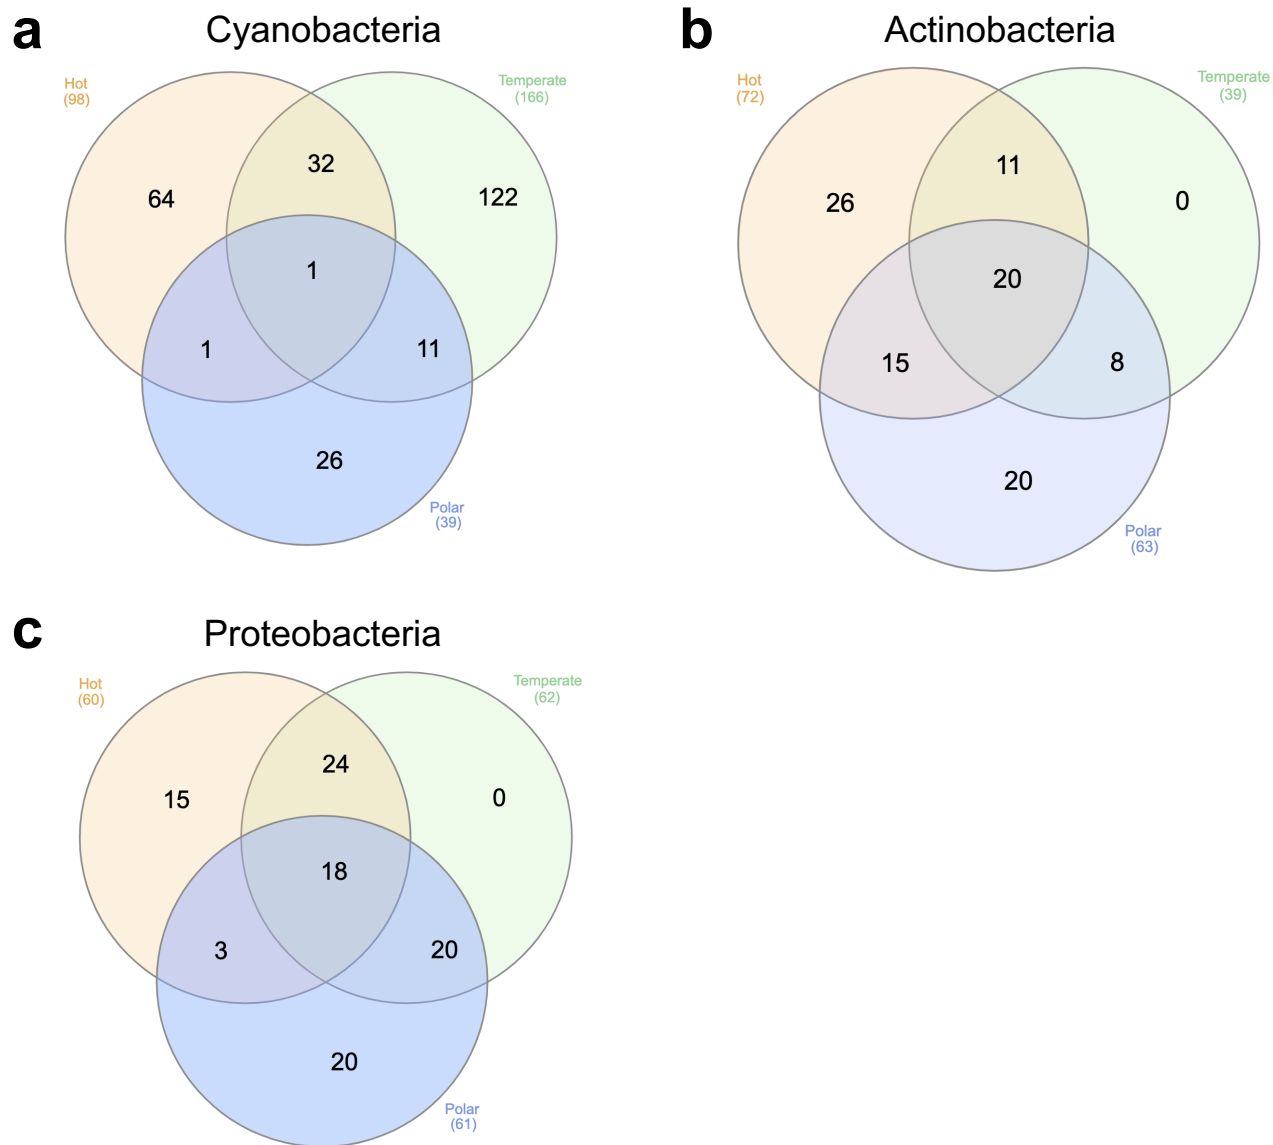

**Figure S3:** Venn diagram showing distribution of **(a)** all Cyanobacteria OTUs, **(b)** 100 most abundant Actinobacteria OTUs, and **(c)** 100 most abundant Proteobacteria OTUs between the three climate regimes (hot, polar, and temperate).

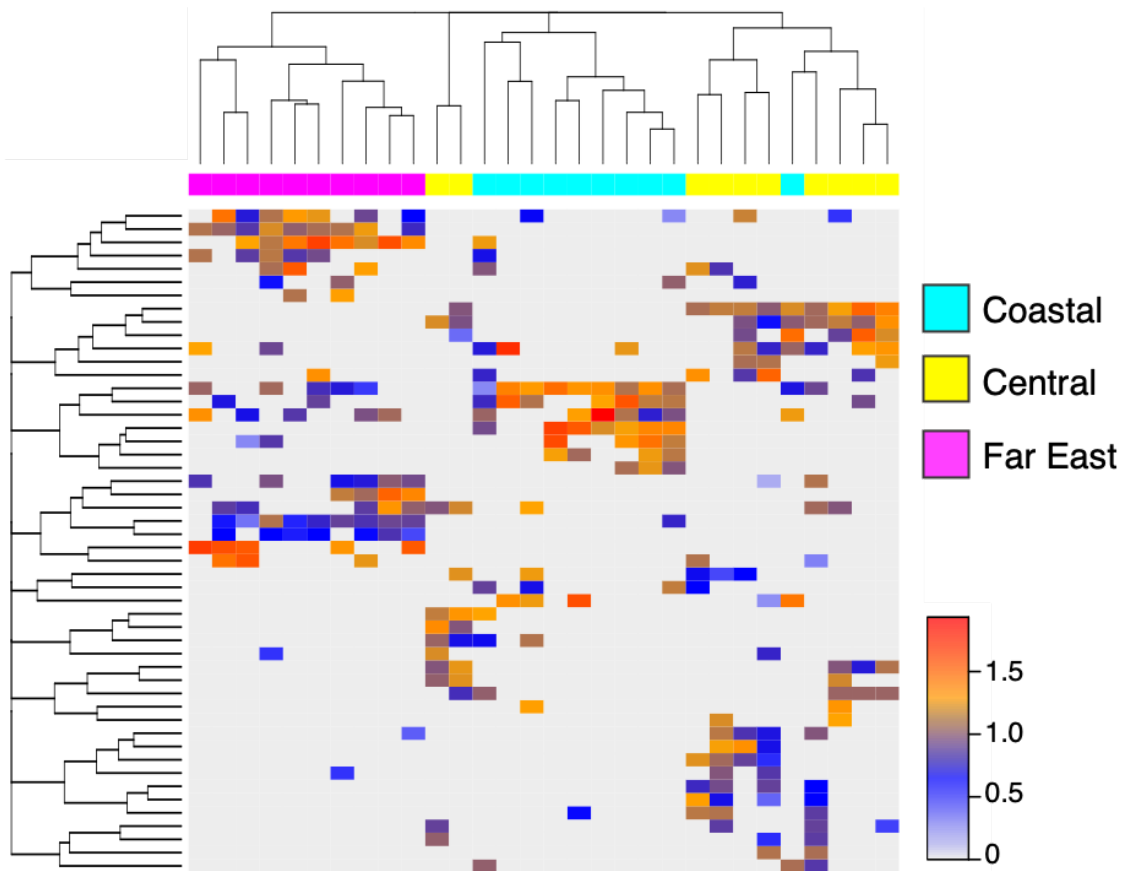

**Figure S4: Heatmap of Namib Desert Actinobacteria.** Actinobacteria OTUs from three sites in the Namib Desert. Rows correspond to OTUs and columns correspond to individual samples. Color scale represents log-normalized relative abundances.

## Scripts used for analyses of sequence data

```
## 16s analysis pipeline using QIIME2 and sequence variant picking
with DADA2

source activate qiime2

## step 1: import your sequences into a QIIME artifact using a
manifest file
# manifest file is a .csv file that gives the fwd and rev filenames
for paired end reads
  # 3 columns:
  # (1) 'sample-id': name of sample
  # (2) 'absolute-filepath': path to file
  # (3) 'direction': 'forward' or 'reverse'
#'sed 's/"//g' < infile > outfile' to remove quotes if you make in
Excel

qiime tools import \
  --type SampleData[PairedEndSequencesWithQuality] \
  --input-path manifest.csv \
  --output-path sequences.qza \
  --input-format PairedEndFastqManifestPhred33 \

# view read count and phred scores for your data
qiime demux summarize --i-data sequences.qza --o-visualization
sequences.qzv

## step 2: using dada2 package within QIIME2 for denoising, merging,
and variant picking
# adjust trunc/trim lengths as needed depending on your quality plot

qiime dada2 denoise-paired \
  --i-demultiplexed-seqs sequences.qza \
  --p-trunc-len-f 250 \
  --p-trunc-len-r 250 \
  --p-trim-left-f 0 \
  --p-trim-left-r 0 \
  --output-dir dada2-out \
  --verbose \
```

```

# cluster sequences open reference at 0.97 identity with vsearch
package
# use the latest edition of SILVA
qiime vsearch cluster-features-open-reference \
  --i-table dada2-out/table.qza \
  --i-data dada2-out/rep-seqs.qza \
  --i-reference-sequences 97_silva.qza \
  --p-perc-identity 0.97 \
  --p-strand both \
  --output-dir 97-cluster \
  --verbose \

# visualize feature table and rep seqs
qiime feature-table summarize \
  --i-table feature-table.qza \
  --o-visualization feature-table.qzv \
  --m-sample-metadata-file metadata.txt

qiime feature-table tabulate-seqs \
  --i-data rep-seqs.qza --o-visualization rep-seqs.qzv

## step 3: cluster with vsearch into 97% identity OTUs
## for reference sequences, use SILVA 16S database at 0.97 identity

qiime vsearch cluster-features-open-reference \
  --i-sequences rep-seqs.qza \
  --i-table feature-table.qza \
  --i-reference-sequences \
  --p-perc-identity 0.97 \
  --p-strand both \
  --output-dir 97-clust/

## step 4: assign taxonomy (requires trained classifier)
qiime feature-classifier classify-sklearn \
  --i-classifier classifier.qza \
  --i-reads repseqs.qza \
  --o-classification taxonomy.qza

# visualize taxonomy barplots
qiime taxa barplot \
  --i-table otu-table.qza \

```

```

--i-taxonomy taxonomy.qza \
--m-metadata-file metadata.txt \
--o-visualization taxa-bar-plots.qzv

## step 5: make rooted tree of ref-seqs

qiime alignment mafft --i-sequences rep-seqs.qza --o-alignment
aligned-rep-seqs.qza
qiime alignment mask --i-alignment aligned-rep-seqs.qza --o-
masked-alignment masked-rep-seqs.qza
qiime phylogeny fasttree --i-alignment masked-rep-seqs.qza --o-
tree unrooted-tree.qza
qiime phylogeny midpoint-root --i-tree unrooted-tree.qza --o-
rooted-tree rooted-tree.qza

## step 6: run core alpha and beta diversity metrics
# adjust sampling depth as needed
qiime diversity core-metrics \
    --i-phylogeny rooted-tree.qza \
    --i-table feature-table.qza \
    --p-sampling-depth $DEPTH \
    --m-metadata-file metadata.txt
    --output-dir core-metrics-results

##step 7: statistical tests
# adonis test
qiime diversity beta-group-significance \
    --i-distance-matrix weighted_unifrac_distance_matrix.qza \
    --m-metadata-file metadata.txt \
    --p-method permanova \
    --metadata-column XXX \
    --o-visualization adonis.qzv

#mantel test
#first, create a euclidean distance matrix from your metadata
qiime metadata distance-matrix \
    --i-metadata-file metadata.txt \
    --m-metadata-column XXX \
    --o-distance-matrix metadata_distance_matrix.qza

```

```
qiime diversity mantel \  
  --i-dm1 weighted_unifrac_distance_matrix.qza \  
  --i-dm2 metadata_distance_matrix.qza \  
  --p-method pearson \  
  --p-intersect-ids True \  
  --o-visualization mantel.qzv  
  
#pearson test for alpha diversity  
qiime diversity alpha-group-significance \  
  --i-alpha-diversity alpha.qza \  
  --m-metadata-file metadata.txt \  
  --o-visualization pearson.qzv  
  
## step 8: making bipartite networks in QIIME1  
source activate qiime1  
make_otu_network.py -i actino-table-wtax.biom -m actino-mapping.txt -  
o actino-network  
#export to cytoscape
```
